# Supplementary material
Source: PubMed Central journal article supplement (PMC3945030)
Supplement: mmc1.pdf [file mmc1.pdf]

## Supplementary Materials

The interpretation of the derivative  $-\partial R(t|x)/\partial t$  as the probability density of the local accumulation time can be supported by analogy with an irreversible  $A \rightarrow B$  reaction. Let  $N_A(t)$  and  $N_B(t)$  be the numbers of molecules  $A$  and  $B$  in volume  $V$  at time  $t$ , respectively,  $N_A(t) + N_B(t) = N_0$ , where  $N_0$  is the total number of molecules in the system. At  $t=0$ , all molecules are in state  $A$ ,  $N_A(0) = N_0$ ,  $N_B(0) = 0$ . As  $t \rightarrow \infty$ , all molecules transfer to state  $B$ ,  $N_B(\infty) = N_0$ ,  $N_A(\infty) = 0$ . In this case the relaxation function  $R(t)$  is the fraction of molecules  $A$  that survive for time  $t$

$$R(t) = N_A(t)/N_0 = 1 - N_B(t)/N_0. \quad (\text{S.1})$$

Introducing the concentration of molecules  $B$ ,  $C_B(t) = N_B(t)/V$ , we can write  $R(t)$  in the form similar to Eq. (1) from the main text,

$$R(t) = 1 - C_B(t)/C_B(\infty). \quad (\text{S.2})$$

The fraction of molecules  $A$  that are converted to molecules  $B$  between  $t$  and  $t + \Delta t$  is

$$R(t) - R(t + \Delta t) = \frac{N_A(t) - N_A(t + \Delta t)}{N_0} = \frac{N_B(t + \Delta t) - N_B(t)}{N_0}. \quad (\text{S.3})$$

From this it follows that the lifetime probability density of molecules  $A$ ,  $\varphi(t)$ , is given by

$$\varphi(t) = -\frac{dR(t)}{dt} = -\frac{1}{N_0} \frac{dN_A(t)}{dt} = \frac{1}{N_0} \frac{dN_B(t)}{dt}. \quad (\text{S.4})$$

According to Eqs. (S.3) and (S.4), this function is also the probability density for the birth of a  $B$  molecule at time  $t$ .
